# Supplementary material for: Towards universal health coverage for people with stroke in South Africa: a scoping review
Source: PubMed Central journal article supplement (PMC8627414; doi:10.1136/bmjopen-2021-049988), 2021-11-24
Supplement: bmjopen-2021-049988supp001.pdf [file bmjopen-2021-049988supp001.pdf]

---

## Supplementary File - 1

### Achieving Universal Health Coverage for people with stroke in South Africa:

#### OVID Search

Database: Embase <1980 to 2020 Week 24>, Global Health <1910 to 2020 Week 23>, Journals@Ovid Full Text <June 17, 2020>, APA PsycExtra <1908 to June 08, 2020>, APA PsycInfo <1806 to June Week 2 2020>, LSHM Journals@Ovid, Econlit <1886 to June 11, 2020>, Ovid MEDLINE(R) and Epub Ahead of Print, In-Process & Other Non-Indexed Citations, Daily and Versions(R) <1946 to June 16, 2020>, Social Policy and Practice <202004>

Search Strategy:

- 
- 1 Stroke.mp. [mp=ti, ab, hw, tn, ot, dm, mf, dv, kw, fx, dq, bt, id, cc, tx, sh, ct, tc, tm, mh, nm, kf, ox, px, rx, an, ui, sy, pt] (1263546)
  - 2 cerebro vascular accident.mp. [mp=ti, ab, hw, tn, ot, dm, mf, dv, kw, fx, dq, bt, id, cc, tx, sh, ct, tc, tm, mh, nm, kf, ox, px, rx, an, ui, sy, pt] (560)
  - 3 ischaemia.mp. [mp=ti, ab, hw, tn, ot, dm, mf, dv, kw, fx, dq, bt, id, cc, tx, sh, ct, tc, tm, mh, nm, kf, ox, px, rx, an, ui, sy, pt] (140097)
  - 4 hemorrhage.mp. [mp=ti, ab, hw, tn, ot, dm, mf, dv, kw, fx, dq, bt, id, cc, tx, sh, ct, tc, tm, mh, nm, kf, ox, px, rx, an, ui, sy, pt] (923222)
  - 5 Universal health coverage.mp. [mp=ti, ab, hw, tn, ot, dm, mf, dv, kw, fx, dq, bt, id, cc, tx, sh, ct, tc, tm, mh, nm, kf, ox, px, rx, an, ui, sy, pt] (9467)
  - 6 universal access.mp. [mp=ti, ab, hw, tn, ot, dm, mf, dv, kw, fx, dq, bt, id, cc, tx, sh, ct, tc, tm, mh, nm, kf, ox, px, rx, an, ui, sy, pt] (12850)
  - 7 Universal health care.mp. [mp=ti, ab, hw, tn, ot, dm, mf, dv, kw, fx, dq, bt, id, cc, tx, sh, ct, tc, tm, mh, nm, kf, ox, px, rx, an, ui, sy, pt] (7370)
  - 8 universal health access.mp. [mp=ti, ab, hw, tn, ot, dm, mf, dv, kw, fx, dq, bt, id, cc, tx, sh, ct, tc, tm, mh, nm, kf, ox, px, rx, an, ui, sy, pt] (64)
  - 9 stroke disability.mp. [mp=ti, ab, hw, tn, ot, dm, mf, dv, kw, fx, dq, bt, id, cc, tx, sh, ct, tc, tm, mh, nm, kf, ox, px, rx, an, ui, sy, pt] (1581)
  - 10 stroke rehabilitation.mp. [mp=ti, ab, hw, tn, ot, dm, mf, dv, kw, fx, dq, bt, id, cc, tx, sh, ct, tc, tm, mh, nm, kf, ox, px, rx, an, ui, sy, pt] (30385)
  - 11 stroke care.mp. [mp=ti, ab, hw, tn, ot, dm, mf, dv, kw, fx, dq, bt, id, cc, tx, sh, ct, tc, tm, mh, nm, kf, ox, px, rx, an, ui, sy, pt] (18395)
  - 12 treatment access.mp. [mp=ti, ab, hw, tn, ot, dm, mf, dv, kw, fx, dq, bt, id, cc, tx, sh, ct, tc, tm, mh, nm, kf, ox, px, rx, an, ui, sy, pt] (6626)
  - 13 health systems.mp. [mp=ti, ab, hw, tn, ot, dm, mf, dv, kw, fx, dq, bt, id, cc, tx, sh, ct, tc, tm, mh, nm, kf, ox, px, rx, an, ui, sy, pt] (111350)
  - 14 South Africa.mp. [mp=ti, ab, hw, tn, ot, dm, mf, dv, kw, fx, dq, bt, id, cc, tx, sh, ct, tc, tm, mh, nm, kf, ox, px, rx, an, ui, sy, pt] (235927)
  - 15 Eastern Cape.mp. [mp=ti, ab, hw, tn, ot, dm, mf, dv, kw, fx, dq, bt, id, cc, tx, sh, ct, tc, tm, mh, nm, kf, ox, px, rx, an, ui, sy, pt] (4355)
  - 16 Free State.mp. [mp=ti, ab, hw, tn, ot, dm, mf, dv, kw, fx, dq, bt, id, cc, tx, sh, ct, tc, tm, mh, nm, kf, ox, px, rx, an, ui, sy, pt] (14110)
  - 17 Gauteng.mp. [mp=ti, ab, hw, tn, ot, dm, mf, dv, kw, fx, dq, bt, id, cc, tx, sh, ct, tc, tm, mh, nm, kf, ox, px, rx, an, ui, sy, pt] (4356)
  - 18 KwaZulu-Natal.mp. [mp=ti, ab, hw, tn, ot, dm, mf, dv, kw, fx, dq, bt, id, cc, tx, sh, ct, tc, tm, mh, nm, kf, ox, px, rx, an, ui, sy, pt] (11901)

- 
- 19 Limpopo.mp. [mp=ti, ab, hw, tn, ot, dm, mf, dv, kw, fx, dq, bt, id, cc, tx, sh, ct, tc, tm, mh, nm, kf, ox, px, rx, an, ui, sy, pt] (3368)  
20 Mpumalanga.mp. [mp=ti, ab, hw, tn, ot, dm, mf, dv, kw, fx, dq, bt, id, cc, tx, sh, ct, tc, tm, mh, nm, kf, ox, px, rx, an, ui, sy, pt] (1992)  
21 Northern Cape.mp. [mp=ti, ab, hw, tn, ot, dm, mf, dv, kw, fx, dq, bt, id, cc, tx, sh, ct, tc, tm, mh, nm, kf, ox, px, rx, an, ui, sy, pt] (997)  
22 North West.mp. [mp=ti, ab, hw, tn, ot, dm, mf, dv, kw, fx, dq, bt, id, cc, tx, sh, ct, tc, tm, mh, nm, kf, ox, px, rx, an, ui, sy, pt] (39969)  
23 Western Cape.mp. [mp=ti, ab, hw, tn, ot, dm, mf, dv, kw, fx, dq, bt, id, cc, tx, sh, ct, tc, tm, mh, nm, kf, ox, px, rx, an, ui, sy, pt] (8316)  
24 1 or 2 or 3 or 4 (2162628)  
25 5 or 6 or 7 or 8 (28371)  
26 9 or 10 or 11 or 12 (54898)  
27 15 or 16 or 17 or 18 or 19 or 20 or 21 or 22 or 23 (83478)  
28 14 or 27 (286527)  
29 13 or 25 (135636)  
30 24 and 29 (7926)  
31 24 and 26 and 29 (655)  
32 24 and 28 and 29 (433)

\*\*\*\*\*

---

### UHC for Stroke care in SA - Scopus Search results

(Stroke OR Universal health coverage) AND (Health system) AND ( LIMIT-TO ( AFFILCOUNTRY,"South Africa" ) ) AND ( LIMIT-TO ( PUBYEAR,2020) OR LIMIT-TO ( PUBYEAR,2019) OR LIMIT-TO ( PUBYEAR,2018) OR LIMIT-TO ( PUBYEAR,2017) OR LIMIT-TO ( PUBYEAR,2016) OR LIMIT-TO ( PUBYEAR,2015) OR LIMIT-TO ( PUBYEAR,2014) OR LIMIT-TO ( PUBYEAR,2013) OR LIMIT-TO ( PUBYEAR,2012) OR LIMIT-TO ( PUBYEAR,2011) OR LIMIT-TO ( PUBYEAR,2010) OR LIMIT-TO ( PUBYEAR,2009) OR LIMIT-TO ( PUBYEAR,2008) OR LIMIT-TO ( PUBYEAR,2007) OR LIMIT-TO ( PUBYEAR,2006) OR LIMIT-TO ( PUBYEAR,2004) OR LIMIT-TO ( PUBYEAR,2003) OR LIMIT-TO ( PUBYEAR,2002) OR LIMIT-TO ( PUBYEAR,2000) ) AND ( LIMIT-TO ( openaccess,1) ) AND ( LIMIT-TO ( SUBJAREA,"MEDI" ) OR LIMIT-TO ( SUBJAREA,"SOCI" ) OR LIMIT-TO ( SUBJAREA,"MULT" ) OR LIMIT-TO ( SUBJAREA,"NURS" ) OR LIMIT-TO ( SUBJAREA,"HEAL" ) OR LIMIT-TO ( SUBJAREA,"ENVI" ) OR LIMIT-TO ( SUBJAREA,"PSYC" ) OR LIMIT-TO ( SUBJAREA,"ECON" ) OR LIMIT-TO ( SUBJAREA,"ARTS" ) OR LIMIT-TO ( SUBJAREA,"NEUR" ) ) AND ( LIMIT-TO ( PUBSTAGE,"final" ) OR LIMIT-TO ( PUBSTAGE,"aip" ) )

Print Search History: EBSCOhost

|    |                                                                                                                                                                                |                                                                                                                                                                                                                                                                                                                                                                                                                                                                                                                                                                                                                                                                                                                                                                     |                                                                                                                       |        |
|----|--------------------------------------------------------------------------------------------------------------------------------------------------------------------------------|---------------------------------------------------------------------------------------------------------------------------------------------------------------------------------------------------------------------------------------------------------------------------------------------------------------------------------------------------------------------------------------------------------------------------------------------------------------------------------------------------------------------------------------------------------------------------------------------------------------------------------------------------------------------------------------------------------------------------------------------------------------------|-----------------------------------------------------------------------------------------------------------------------|--------|
|    |                                                                                                                                                                                | Narrow by<br>SubjectThesaurus: -<br>qualitative research<br>Narrow by<br>SubjectThesaurus: -<br>primary care<br>Narrow by<br>SubjectThesaurus: -<br>evaluation research<br>Narrow by<br>SubjectThesaurus: -<br>health behavior<br>Narrow by<br>SubjectThesaurus: -<br>community health<br>services<br>Narrow by<br>SubjectThesaurus: -<br>health outcome<br>assessment<br>Narrow by<br>SubjectThesaurus: -<br>government policy<br>Narrow by<br>SubjectThesaurus: -<br>world health<br>Narrow by<br>SubjectThesaurus: -<br>quality of life<br>Narrow by<br>SubjectThesaurus: -<br>health services<br>accessibility<br>Narrow by<br>SubjectThesaurus: -<br>health promotion<br>Narrow by<br>SubjectThesaurus: -<br>public health<br>Search modes -<br>Boolean/Phrase |                                                                                                                       |        |
| S5 | ( stroke or cerebrovascular accident or cva or cerebral vascular event or cve or transient ischaemic attack or tia ) OR ( stroke rehabilitation or stroke recovery ) OR stroke | Limiters - Published Date: 20050101-20200631<br>Expanders - Apply related words; Apply equivalent subjects<br>Narrow by Language: - english                                                                                                                                                                                                                                                                                                                                                                                                                                                                                                                                                                                                                         | Interface - EBSCOhost<br>Research Databases<br>Search Screen - Advanced Search<br>Database - Academic Search Complete | 16,739 |

## Print Search History: EBSCOhost

prevention OR stroke  
patients AND universal  
health care OR universal  
health coverage OR  
universal health coverage  
in south africa AND  
health system OR health  
systems strengthening  
OR ( health system or  
health services ) OR  
health systems  
management AND south  
africa

Narrow by  
SubjectThesaurus: -  
public health surveillance  
Narrow by  
SubjectThesaurus: -  
primary health care  
Narrow by  
SubjectThesaurus: -  
national health services  
Narrow by  
SubjectThesaurus: -  
health insurance  
Narrow by  
SubjectThesaurus: -  
health disparities  
Narrow by  
SubjectThesaurus: -  
health care reform  
Narrow by  
SubjectThesaurus: -  
health programs  
Narrow by  
SubjectThesaurus: -  
chronic diseases  
Narrow by  
SubjectThesaurus: -  
economics  
Narrow by  
SubjectThesaurus: -  
systematic reviews  
(medical research)  
Narrow by  
SubjectThesaurus: -  
qualitative research  
Narrow by  
SubjectThesaurus: -  
primary care  
Narrow by  
SubjectThesaurus: -  
evaluation research  
Narrow by  
SubjectThesaurus: -  
health behavior  
Narrow by  
SubjectThesaurus: -  
community health  
services  
Narrow by  
SubjectThesaurus: -

Print Search History: EBSCOhost

|    |                                                                                                                                                                                                                                                                                                                                                                                                                                                          |                                                                                                                                                                                                                                                                                                                                                                                                                                                                                                       |                                                                                                                       |        |
|----|----------------------------------------------------------------------------------------------------------------------------------------------------------------------------------------------------------------------------------------------------------------------------------------------------------------------------------------------------------------------------------------------------------------------------------------------------------|-------------------------------------------------------------------------------------------------------------------------------------------------------------------------------------------------------------------------------------------------------------------------------------------------------------------------------------------------------------------------------------------------------------------------------------------------------------------------------------------------------|-----------------------------------------------------------------------------------------------------------------------|--------|
|    |                                                                                                                                                                                                                                                                                                                                                                                                                                                          | health outcome<br>assessment<br>Narrow by<br>SubjectThesaurus: -<br>government policy<br>Narrow by<br>SubjectThesaurus: -<br>world health<br>Narrow by<br>SubjectThesaurus: -<br>quality of life<br>Narrow by<br>SubjectThesaurus: -<br>health services<br>accessibility<br>Narrow by<br>SubjectThesaurus: -<br>health promotion<br>Narrow by<br>SubjectThesaurus: -<br>public health<br>Search modes -<br>Boolean/Phrase                                                                             |                                                                                                                       |        |
| S4 | ( stroke or cerebrovascular accident or cva or cerebral vascular event or cve or transient ischaemic attack or tia ) OR ( stroke rehabilitation or stroke recovery ) OR stroke prevention OR stroke patients AND universal health care OR universal health coverage OR universal health coverage in south africa AND health system OR health systems strengthening OR ( health system or health services ) OR health systems management AND south africa | Limiters - Published Date: 20050101-20200631<br>Expanders - Apply related words; Apply equivalent subjects<br>Narrow by<br>SubjectThesaurus: - public health surveillance<br>Narrow by<br>SubjectThesaurus: - primary health care<br>Narrow by<br>SubjectThesaurus: - national health services<br>Narrow by<br>SubjectThesaurus: - health insurance<br>Narrow by<br>SubjectThesaurus: - health disparities<br>Narrow by<br>SubjectThesaurus: - health care reform<br>Narrow by<br>SubjectThesaurus: - | Interface - EBSCOhost<br>Research Databases<br>Search Screen - Advanced Search<br>Database - Academic Search Complete | 17,251 |

---

Print Search History: EBSCOhost

health programs  
Narrow by  
SubjectThesaurus: -  
chronic diseases  
Narrow by  
SubjectThesaurus: -  
economics  
Narrow by  
SubjectThesaurus: -  
systematic reviews  
(medical research)  
Narrow by  
SubjectThesaurus: -  
qualitative research  
Narrow by  
SubjectThesaurus: -  
primary care  
Narrow by  
SubjectThesaurus: -  
evaluation research  
Narrow by  
SubjectThesaurus: -  
health behavior  
Narrow by  
SubjectThesaurus: -  
community health  
services  
Narrow by  
SubjectThesaurus: -  
health outcome  
assessment  
Narrow by  
SubjectThesaurus: -  
government policy  
Narrow by  
SubjectThesaurus: -  
world health  
Narrow by  
SubjectThesaurus: -  
quality of life  
Narrow by  
SubjectThesaurus: -  
health services  
accessibility  
Narrow by  
SubjectThesaurus: -  
health promotion  
Narrow by  
SubjectThesaurus: -

---

## Print Search History: EBSCOhost

|    |                                                                                                                                                                                                                                                                                                                                                                                                                                                          |                                                                                                                                                                                                  |                                                                                                                       |         |
|----|----------------------------------------------------------------------------------------------------------------------------------------------------------------------------------------------------------------------------------------------------------------------------------------------------------------------------------------------------------------------------------------------------------------------------------------------------------|--------------------------------------------------------------------------------------------------------------------------------------------------------------------------------------------------|-----------------------------------------------------------------------------------------------------------------------|---------|
|    |                                                                                                                                                                                                                                                                                                                                                                                                                                                          | public health<br>Search modes -<br>Boolean/Phrase                                                                                                                                                |                                                                                                                       |         |
| S3 | ( stroke or cerebrovascular accident or cva or cerebral vascular event or cve or transient ischaemic attack or tia ) OR ( stroke rehabilitation or stroke recovery ) OR stroke prevention OR stroke patients AND universal health care OR universal health coverage OR universal health coverage in south africa AND health system OR health systems strengthening OR ( health system or health services ) OR health systems management AND south africa | Limiters - Published<br>Date: 20050101-20200631<br>Expanders - Apply related words; Apply equivalent subjects<br>Narrow by<br>SubjectThesaurus: - public health<br>Search modes - Boolean/Phrase | Interface - EBSCOhost<br>Research Databases<br>Search Screen - Advanced Search<br>Database - Academic Search Complete | 84,912  |
| S2 | ( stroke or cerebrovascular accident or cva or cerebral vascular event or cve or transient ischaemic attack or tia ) OR ( stroke rehabilitation or stroke recovery ) OR stroke prevention OR stroke patients AND universal health care OR universal health coverage OR universal health coverage in south africa AND health system OR health systems strengthening OR ( health system or health services ) OR health systems management AND south africa | Limiters - Published<br>Date: 20050101-20200631<br>Expanders - Apply related words; Apply equivalent subjects<br>Search modes - Boolean/Phrase                                                   | Interface - EBSCOhost<br>Research Databases<br>Search Screen - Advanced Search<br>Database - Academic Search Complete | 878,271 |
| S1 | ( stroke or cerebrovascular accident or cva or cerebral                                                                                                                                                                                                                                                                                                                                                                                                  | Limiters - Published<br>Date: 20050101-20200631                                                                                                                                                  | Interface - EBSCOhost<br>Research Databases<br>Search Screen - Advanced                                               | 878,271 |



## Print Search History: EBSCOhost

vascular event or cve or  
transient ischaemic  
attack or tia ) OR ( stroke  
rehabilitation or stroke  
recovery ) OR stroke  
prevention OR stroke  
patients AND universal  
health care OR universal  
health coverage OR  
universal health coverage  
in south africa AND  
health system OR health  
systems strengthening  
OR ( health system or  
health services ) OR  
health systems  
management OR health  
system financing

Expanders - Apply  
related words; Apply  
equivalent subjects  
Search modes -  
Boolean/Phrase

Search  
Database - Academic Search  
Complete
