# Supplementary material for: Towards universal health coverage for people with stroke in South Africa: a scoping review
Source: PubMed Central journal article supplement (PMC8627414; doi:10.1136/bmjopen-2021-049988), 2021-11-24
Supplement: bmjopen-2021-049988supp002.pdf [file bmjopen-2021-049988supp002.pdf]

## Supplementary file S2

| FRAMEWORK COMPONENT           | DESCRIPTION (data items)                                                                                                                                                                                                                                                                                                                                                                                                                                                                                                                                                                                                                                                                                                                                                      |
|-------------------------------|-------------------------------------------------------------------------------------------------------------------------------------------------------------------------------------------------------------------------------------------------------------------------------------------------------------------------------------------------------------------------------------------------------------------------------------------------------------------------------------------------------------------------------------------------------------------------------------------------------------------------------------------------------------------------------------------------------------------------------------------------------------------------------|
| <b>Governance/Regulation</b>  | <p><b>Description:</b> a wide range of steering and rulemaking-related functions carried out by governments/decisions makers as they seek to achieve national and/or provincial health policy objectives that are conducive to UHC</p> <p><b>Data Items:</b> Healthcare policies at national or provincial levels; resource allocation policies; accountability monitoring; coordination and regulations; clinical treatment guidelines.</p>                                                                                                                                                                                                                                                                                                                                  |
| <b>Resources</b>              | <p><b>Description:</b> All resources specific to the health care facility – including the physical structure and resources enabling or hindering delivery of health services.</p> <p><b>Data Items:</b></p> <p><b>Infrastructure:</b> Accessibility of the health care facilities; maintenance of infrastructure; availability of equipment/testing facilities (e.g. CT Scans)</p> <p><b>Human resources:</b> Availability; health workforce distribution – health professions/experience or specialisation/gender; role definitions; undergraduate &amp; continuous training; workload; patient vs therapist ratio.</p> <p><b>Financial resources:</b> Finance allocation and affordability; funding sources; healthcare packages; salaries/fair wages.; sustainability.</p> |
| <b>Service Delivery</b>       | <p><b>Description:</b> Delivery of different health services as well as user experience.</p> <p><b>Data Items:</b> Level of care; comprehensiveness; quality and/or perceptions of care; multi-professional health teams; continuity of care, timeliness of care; health services and service providers (private/public; for-profit or not-for-profit, formal or informal, professional or non-professional, allopathic or traditional, remunerated or voluntary).</p>                                                                                                                                                                                                                                                                                                        |
| <b>Context</b>                | <p><b>Description:</b> All contextual factors influencing the patient/community access of the health care system.</p> <p><b>Data Items:</b> Social determinants of health: socio-economic, education, health literacy, technological, cultural, political and environmental environments.</p>                                                                                                                                                                                                                                                                                                                                                                                                                                                                                 |
| <b>Re-orientation of care</b> | <p><b>Description:</b> New and innovate health care solutions to improve coordination of health services and continuous health care; and intersectoral coordination.</p> <p><b>Data Items:</b> New technologies and strategies (eHealth; shared electronic medical records; telemedicine; m-health)</p>                                                                                                                                                                                                                                                                                                                                                                                                                                                                       |
| <b>Community engagement</b>   | <p><b>Description:</b> Engaging and empowering individuals, families, communities and informal caregivers to facilitate common decision-making and self-efficacy. Reaching underserved and marginalised communities.</p>                                                                                                                                                                                                                                                                                                                                                                                                                                                                                                                                                      |

Application of the key characteristics of the analytical framework

| FRAMEWORK COMPONENT           | DESCRIPTION (data items)                                                                                                                                                                                                                                                                                                                                                                                                                                                                                                                                                                                                                                                                                                                                                      |
|-------------------------------|-------------------------------------------------------------------------------------------------------------------------------------------------------------------------------------------------------------------------------------------------------------------------------------------------------------------------------------------------------------------------------------------------------------------------------------------------------------------------------------------------------------------------------------------------------------------------------------------------------------------------------------------------------------------------------------------------------------------------------------------------------------------------------|
| <b>Governance/Regulation</b>  | <p><b>Description:</b> a wide range of steering and rulemaking-related functions carried out by governments/decisions makers as they seek to achieve national and/or provincial health policy objectives that are conducive to UHC</p> <p><b>Data Items:</b> Healthcare policies at national or provincial levels; resource allocation policies; accountability monitoring; coordination and regulations; clinical treatment guidelines.</p>                                                                                                                                                                                                                                                                                                                                  |
| <b>Resources</b>              | <p><b>Description:</b> All resources specific to the health care facility – including the physical structure and resources enabling or hindering delivery of health services.</p> <p><b>Data Items:</b></p> <p><b>Infrastructure:</b> Accessibility of the health care facilities; maintenance of infrastructure; availability of equipment/testing facilities (e.g. CT Scans)</p> <p><b>Human resources:</b> Availability; health workforce distribution – health professions/experience or specialisation/gender; role definitions; undergraduate &amp; continuous training; workload; patient vs therapist ratio.</p> <p><b>Financial resources:</b> Finance allocation and affordability; funding sources; healthcare packages; salaries/fair wages.; sustainability.</p> |
| <b>Service Delivery</b>       | <p><b>Description:</b> Delivery of different health services as well as user experience.</p> <p><b>Data Items:</b> Level of care; comprehensiveness; quality and/or perceptions of care; multiprofessional health teams; referral systems; service delivery models; health services and service providers (private/public; for-profit or not-for-profit, formal or informal, professional or non-professional, allopathic or traditional, remunerated or voluntary).</p>                                                                                                                                                                                                                                                                                                      |
| <b>Context</b>                | <p><b>Description:</b> All contextual factors influencing the patient/community access of the health care system.</p> <p><b>Data Items:</b> Social determinants of health: socio-economic, education, health literacy, technological, cultural, political and environmental environments.</p>                                                                                                                                                                                                                                                                                                                                                                                                                                                                                 |
| <b>Re-orientation of care</b> | <p><b>Description:</b> New and innovate health care solutions to improve coordination of health services and continuous health care; and intersectoral coordination.</p> <p><b>Data Items:</b> New technologies and strategies (eHealth; shared electronic medical records; telemedicine; m-health)</p>                                                                                                                                                                                                                                                                                                                                                                                                                                                                       |
| <b>Community engagement</b>   | <p><b>Description:</b> Engaging and empowering individuals, families, communities and informal caregivers to facilitate common decision-making and self-efficacy. Reaching underserved and marginalised communities.</p>                                                                                                                                                                                                                                                                                                                                                                                                                                                                                                                                                      |
