# Supplementary material for: Towards universal health coverage for people with stroke in South Africa: a scoping review
Source: PubMed Central journal article supplement (PMC8627414; doi:10.1136/bmjopen-2021-049988), 2021-11-24
Supplement: bmjopen-2021-049988supp003.pdf [file bmjopen-2021-049988supp003.pdf]

## Supplementary file S3. Detailed demographic information of all included records (N=59)

| S.no | Author (year)                | Province     | Area      | Level of care            | Literature                                      | Aim                                                                                                                                                                                                                    | Study design                                | Sample characteristics                                                                                                                                          |
|------|------------------------------|--------------|-----------|--------------------------|-------------------------------------------------|------------------------------------------------------------------------------------------------------------------------------------------------------------------------------------------------------------------------|---------------------------------------------|-----------------------------------------------------------------------------------------------------------------------------------------------------------------|
| 1    | Arowoia (2014)               | Western Cape | Urban     | Primary Healthcare (CHC) | Dissertations                                   | To determine and explore the participation restrictions experienced by stroke patients                                                                                                                                 | Mixed Methods (Survey + FGDs)               | 120 stroke patients receiving Physiotherapy for survey & 2 FGDs with 17 stroke patients                                                                         |
| 2    | Bham & Ross 2005             | Not reported | Undefined | Community                | Primary Literature (peer reviewed publications) | To investigate the beliefs of caregivers and traditional healers within the South African Indian Muslim community regarding the etiology and treatment of stroke and the persons likely to be consulted in this regard | Descriptive case study design (Qualitative) | 10 SAIM caregivers of people who had sustained strokes, as well as 10 SAIM traditional healers, who had treated stroke patients.                                |
| 3    | Biggs (2005)                 | Western Cape | Urban     | Primary Healthcare (CHC) | Dissertations                                   | To determine the health promotion needs of stroke patients accessing selected Community Health Centres in the Metropole region of the Western Cape.                                                                    | Mixed Methods (Survey + In-depth interview) | 418 stroke patients, representing each of the health districts of the Metropole region of the Western Cape for the survey and 12 stroke patients for Interviews |
| 4    | Biggs & Rhoda 2008           | Western Cape | Urban     | Primary Healthcare (CHC) | Primary Literature (peer reviewed publications) | To determine the health risk behaviours and factors that influence these behaviours of stroke patients in the Metropole Region of the Western Cape, South Africa                                                       | Mixed Methods (Survey + In-depth interview) | 417 stroke patients – survey<br>12 stroke patients for Interviews                                                                                               |
| 5    | Blackwell & Littlejohns 2010 | Gauteng,     | Undefined | Undefined                | Primary Literature (peer reviewed publications) | To measure the prevalence and review the assessment and management strategies related to dysphagia in three private rehabilitation clinics in South Africa                                                             | Review of records and thematic analysis     | 30 stroke patient records from three private rehabilitation clinics – total 90 records                                                                          |
| 6    | Botha (2008)                 | Western Cape | Undefined | Community                | Dissertations                                   | To refine and pilot a training booklet for caregivers of stroke survivors for further                                                                                                                                  | Mixed methods (Literature review +          | Sample – 1: 11 Stroke patients in WCRC<br>Sample – 2: 1Family members /other                                                                                    |

|    |                    |              |           |           |                                                                     |                                                                                                                                                                                                                                                                              |                                                        |                                                                                                                                                                                                                                                                                                                                                                |
|----|--------------------|--------------|-----------|-----------|---------------------------------------------------------------------|------------------------------------------------------------------------------------------------------------------------------------------------------------------------------------------------------------------------------------------------------------------------------|--------------------------------------------------------|----------------------------------------------------------------------------------------------------------------------------------------------------------------------------------------------------------------------------------------------------------------------------------------------------------------------------------------------------------------|
|    |                    |              |           |           |                                                                     | implementation                                                                                                                                                                                                                                                               | Checklist development + survey + FGDs)                 | carers of Stroke patients in WCRC<br>Sample – 3: 4 Home based carers and 22 nursing assistants attending carer training at WCRC<br>Sample – 4: 4 Stroke patients and their 4 caregivers participating in home-based care programme at university of Western Cape in Nyanga<br>Sample -5: Stroke patients in WCRC<br>Total 15 stroke patients and 31 caregivers |
| 7  | Bryer (2009)       | South Africa | Undefined | Undefined | Primary Literature (peer reviewed publications)                     | There is an urgent need to develop a model of community-based stroke care with appropriate Rehabilitation facilities and trained professionals<br>In South Africa, particularly in under-resourced areas                                                                     | Editorial                                              | NA                                                                                                                                                                                                                                                                                                                                                             |
| 8  | Bryer et al (2010) | South Africa | NA        | NA        | Primary Literature (peer reviewed publications, Clinical Guideline) | The objective was to update the guideline published in 2000, to place the recommendations within the current South African context, and to grade evidence according to the level of scientific rigour for management of ischaemic stroke and transient ischaemic attack 2010 | SASS writing committee Guidelines                      | NA                                                                                                                                                                                                                                                                                                                                                             |
| 9  | Burton 2016        | South Africa | Undefined | Undefined | Primary Literature (peer reviewed publications)                     | To investigate the efforts of a woman with a talent for getting things done for bringing stroke units out of the blue for South Africa                                                                                                                                       | Editorial                                              | NA                                                                                                                                                                                                                                                                                                                                                             |
| 10 | Cawood 2012        | Western Cape | Urban     | Community | Dissertations                                                       | To determine if uninsured stroke survivors living in the Helderberg Basin (Western Cape) reached their optimal                                                                                                                                                               | A descriptive, mixed methods study (Surev + Interview) | 53 stroke survivors (quantitative)<br>5 Stroke survivors (qualitative)                                                                                                                                                                                                                                                                                         |

|    |                          |                    |           |                               |                                                 |                                                                                                                                                                           |                                                                                            |                                                                                                                                                   |
|----|--------------------------|--------------------|-----------|-------------------------------|-------------------------------------------------|---------------------------------------------------------------------------------------------------------------------------------------------------------------------------|--------------------------------------------------------------------------------------------|---------------------------------------------------------------------------------------------------------------------------------------------------|
|    |                          |                    |           |                               |                                                 | rehabilitation outcome levels and if not, what environmental barriers contributed to this.                                                                                |                                                                                            |                                                                                                                                                   |
| 11 | Cawood & Visagie (2015)  | Western Cape       | Urban     | Community                     | Primary Literature (peer reviewed publications) | To determine environmental barriers and facilitators to participation experienced by a group of stroke survivors in the Western Cape province of South Africa.            | A descriptive, mixed methods study (Surev + Interview)                                     | 53 stroke survivors (quantitative)<br>5 Stroke survivors (qualitative)                                                                            |
| 12 | Cawood & Visagie (2016)  | Western Cape       | Urban     | Community                     | Primary Literature (peer reviewed publications) | To describe the functional outcomes achieved by stroke survivors in an urban Western Cape Province setting to add to the information on stroke management                 | A descriptive, mixed methods study (Surev + Interview)                                     | 53 stroke survivors (quantitative)<br>5 Stroke survivors (qualitative)                                                                            |
| 13 | Cawood et al (2016)      | Western Cape       | Urban     | Community                     | Primary Literature (peer reviewed publications) | To explore causal connections between impairments, activity limitations and participation restrictions after stroke.                                                      | Cross-sectional Study                                                                      | 53 stroke survivors                                                                                                                               |
| 14 | Connor (2005)            | Sub Saharan Africa | Undefined | Undefined                     | Primary Literature (peer reviewed publications) | To understand the burden of stroke in black populations in sub-Saharan Africa                                                                                             | Systematic Review                                                                          | All articles relevant to stroke in Sub Saharan Africa                                                                                             |
| 15 | Cunningham (2012)        | Eastern cape       | Urban     | Uitenhage Provincial Hospital | Dissertations                                   | To determine and explore the outcomes of stroke patients admitted to Uitenhage provincial hospital                                                                        | Mixed Methods (quantitative survey + secondary data analysis + Semi-structured interviews) | 168 stroke patient records for secondary data analysis, 24 stroke patients for prospective survey and 9 stroke patients for the qualitative study |
| 16 | Cunningham & Rhoda 2014  | Eastern Cape       | Urban     | Community                     | Primary Literature (peer reviewed publications) | To determine the outcome of stroke patients in Eastern cape                                                                                                               | Concurrent Mixed Methods design                                                            | 24 Stroke Patients (Quantitative Survey)<br>9 Stroke patients (Qualitative interviews)                                                            |
| 17 | De la Cornillière (2007) | Western cape       | Urban     | BLRC Rehab centre             | Dissertations                                   | To describe the range of experiences of stroke patients relating to attendance or non-attendance of those referred to the Bishop Lavis Rehabilitation centre stroke group | Mixed Methods Descriptive study                                                            | 20 participants with stroke for questionnaire survey and 6 stroke participants for FGD.                                                           |

|    |                         |                      |           |                                   |                                                 |                                                                                                                                                                                                                                                              |                                                         |                                                                    |
|----|-------------------------|----------------------|-----------|-----------------------------------|-------------------------------------------------|--------------------------------------------------------------------------------------------------------------------------------------------------------------------------------------------------------------------------------------------------------------|---------------------------------------------------------|--------------------------------------------------------------------|
| 18 | De Villiers et al 2009  | Cape Town            | Urban     | Secondary hospital                | Primary Literature (peer reviewed publications) | To examine the impact of multidisciplinary stroke care on the in-hospital mortality, resource utilization, and access to inpatient rehabilitation facilities for stroke patients admitted in Stroke units at a secondary hospital in Cape Town, South Africa | Cross-sectional pre and post study design               | 195 stroke patients                                                |
| 19 | De Villiers 2011        | Cape Town            | Urban     | District hospital                 | Primary Literature (peer reviewed publications) | To determine survival, disability and functional outcomes of stroke patients following their discharge from an acute stroke unit in an urban community with limited rehabilitative resources                                                                 | Cross-sectional pre and post study design               | 196 stroke patients                                                |
| 20 | Eloker (2015)           | Western Cape         | Urban     | CHC                               | Dissertations                                   | To determine participation restrictions and social support in patients with stroke, living in the Western Cape.                                                                                                                                              | Mixed methods (Systematic Review + Quantitative survey) | 106 stroke patients                                                |
| 21 | Faux (2006)             | Non-specific         | Undefined | Undefined                         | Primary Literature (peer reviewed publications) | To provide a practical guide to helping stroke survivors who have a persistent disability maintain and enhance the gains made in rehabilitation                                                                                                              | Narrative review recommendation                         | NA                                                                 |
| 22 | Felemengas (2005)       | Johannesburg Gauteng | Urban     | Academic hospital                 | Dissertations                                   | To investigate the family dynamics within the family system, as well as how these have evolved or changed following a stroke.                                                                                                                                | Qualitative                                             | 6 primary caregivers of stroke survivors                           |
| 23 | Groenewald & Rhoda 2017 | Western Cape         | Urban     | Non-Governmental facility         | Primary Literature (peer reviewed publications) | To determine outcomes of stroke patients managed by a multidisciplinary team at a step-down facility in the Western Cape.                                                                                                                                    | A longitudinal observational study                      | 68 stroke patients                                                 |
| 24 | Groenewald (2018)       | Western Cape         | Urban     | Step down rehabilitation facility | Dissertations                                   | To adapt and contextualize the original UK Bridges stroke SMI workbook for implementation with the South African stroke                                                                                                                                      | A qualitative exploratory study -Interview, FGD, Expert | 13 Health care professionals<br>12 Stroke patients<br>Expert Panel |

|    |                         |                      |       |                                    |                                                 | population                                                                                                                                                                                                                                                             | consultation                                      |                                                                                                  |
|----|-------------------------|----------------------|-------|------------------------------------|-------------------------------------------------|------------------------------------------------------------------------------------------------------------------------------------------------------------------------------------------------------------------------------------------------------------------------|---------------------------------------------------|--------------------------------------------------------------------------------------------------|
| 25 | Hassan et al (2011)     | Western cape         | Urban | Western Cape Rehabilitation centre | Primary Literature (peer reviewed publications) | To explore levels of strain experienced by caregivers and the variables that impact on their strain.                                                                                                                                                                   | Concurrent, mixed method, descriptive design      | 57 caregivers of stroke survivors                                                                |
| 26 | Hilton (2011)           | Johannesburg         | Urban | Community                          | Dissertations                                   | To establish the functional level of patients, the level of strain and quality of life of the caregiver six to 36 months post-stroke, and the influence of demographic factors, caregiver strain and patient's functional ability on quality of life of the caregiver. | Cross-sectional study                             | 35 stroke patients and their caregivers                                                          |
| 27 | Hossain (2016)          | Kwa-Zulu-Natal       | Urban | Ladysmith Regional Hospital        | Dissertations                                   | To investigate the Need for Palliative care in Cerebrovascular Accident (stroke) patients at Ladysmith Regional Hospital                                                                                                                                               | Mixed Methods (qualitative and quantitative)      | 72 stroke patients for quantitative study and 10 stroke patients for qualitative study           |
| 28 | Joseph 2012             | Western cape         | Urban | WCRC – Rehabilitation centre       | Dissertations                                   | To determine the process of rehabilitation and the outcome of patients following in-patient rehabilitation at a facility in the Western Cape                                                                                                                           | A descriptive, observational, longitudinal design | 76 Spinal Cord Injury patients and 67 stroke patients. Total patients (including drop outs) 130. |
| 29 | Kleineibst (2007)       | Western Cape         | Urban | Community                          | Dissertations                                   | To determine the effectiveness of a caregiver support intervention programme to address the need for primary caregivers of stroke survivors in Bishop Lavis Community                                                                                                  | Prospective descriptive qualitative study         | 29 caregivers of stroke survivors                                                                |
| 30 | Kotsokoane et al (2018) | Gauteng              | Urban | CHC                                | Primary Literature (peer reviewed publications) | To determine the level of integration of stroke survivors at Soshanguve community clinics.                                                                                                                                                                             | Retrospective quantitative research design        | 114 stroke survivors                                                                             |
| 31 | Kusambiza-Kiingi (2016) | Johannesburg Gauteng | Urban | CHC                                | Primary Literature (peer reviewed publications) | To determine stroke survivors' levels of community reintegration, quality of life (QOL), satisfaction with the physiotherapy services and the                                                                                                                          | Cross-sectional study                             | 108 stroke survivors and 45 caregivers                                                           |

|    |                       |                     |                 |                                                   |                                                 |                                                                                                                                                                                                                                                                                                     |                                      |                                                                                         |
|----|-----------------------|---------------------|-----------------|---------------------------------------------------|-------------------------------------------------|-----------------------------------------------------------------------------------------------------------------------------------------------------------------------------------------------------------------------------------------------------------------------------------------------------|--------------------------------------|-----------------------------------------------------------------------------------------|
|    |                       |                     |                 |                                                   |                                                 | level of caregiver strain at community health centres within the Johannesburg                                                                                                                                                                                                                       |                                      |                                                                                         |
| 32 | Leichtfuss (2009)     | Western Cape        | Urban           | Private acute care hospitals                      | Dissertations                                   | To examine the practice of doctors with regards to stroke rehabilitation in private acute-care hospitals and to evaluate information shared between doctors and pts i.r.t prognosis, severity, discharge, referral, timing of discharge planning and decision making. in the Western Cape Metropole | Retrospective and descriptive design | 37 doctors treating and discharging stroke patients<br>48 pts                           |
| 33 | Mabunda (2015)        | Western Cape        | Urban           | Private not for profit Intermediate care Facility | Dissertations                                   | To describe the model of service provision at an IC facility and the role it plays in the continuity of care in Cape Town.                                                                                                                                                                          | Cross sectional survey               | 68 stroke patients<br>70 clinical staff                                                 |
| 34 | Makganye (2015)       | Gauteng?            | Urban           | CHC                                               | Dissertations                                   | To investigate the physical, psychological, social, religious                                                                                                                                                                                                                                       | Qualitative design                   | 5 stroke patients and 5 caregivers                                                      |
| 35 | Maleka et al (2012)   | Limpopo and Gauteng | Urban and rural | Community                                         | Primary Literature (peer reviewed publications) | To establish the experience of people living with stroke in low socioeconomic urban and rural areas of South Africa                                                                                                                                                                                 | Qualitative study design             | 32 stroke survivors living in the community                                             |
| 36 | Mamabolo et al (2008) | Gauteng             | Urban           | PHC clinics                                       | Primary Literature (peer reviewed publications) | to establish what demographic, environmental and physical factors influence functional independence post stroke.                                                                                                                                                                                    | Cross-sectional study                | 68 stroke patients                                                                      |
| 37 | Mandizvidza (2017)    | Western Cape        | Urban           | Level 1 2 3 hospitals                             | Dissertations                                   | To describe the acute and post-acute ischaemic stroke services offered to ischaemic stroke patients in level 1, 2, and 3 hospitals in the Cape Metro Health District, compare these services to the national guideline and identify any barriers to optimum stroke                                  | Descriptive cross-sectional study    | 10 doctors and 10 nurses from stroke ward and 8 doctors from emergency ward; pt records |

|    |                         |              |                 |                          |                                                 |                                                                                                                                                              |                                                   |                                                        |
|----|-------------------------|--------------|-----------------|--------------------------|-------------------------------------------------|--------------------------------------------------------------------------------------------------------------------------------------------------------------|---------------------------------------------------|--------------------------------------------------------|
|    |                         |              |                 |                          |                                                 | patient care.                                                                                                                                                |                                                   |                                                        |
| 38 | Mashau et al 2016       | Limpopo      | Rural and Urban | HBC organization         | Primary Literature (peer reviewed publications) | To investigate the impact of caregiving on voluntary home-based caregivers.                                                                                  | A quantitative cross-sectional descriptive survey | 190 home-based caregivers                              |
| 39 | Masuku et al (2018)     | Gauteng      | Urban           | Community                | Primary Literature (peer reviewed publications) | To describe the caregiving experience of female caregivers of PWA residing in Tembisa, a township situated in the east of Johannesburg                       | Qualitative study                                 | 14 primary caregivers of stroke survivors with Aphasia |
| 40 | Matshikiza (2019)       | Western cape | Urban           | Tertiary Hospital        | Dissertations                                   | to determine the pre-hospital barriers and in-hospital delays to emergency care for patients presenting to Groote Schuur Hospital (GSH) with acute stroke.   | prospective, observational study                  | 50 patients with stroke                                |
| 41 | Mudzi (2010)            | Gauteng      | Urban           | Community                | Primary Literature (peer reviewed publications) | To establish the impact of caregiver education on the morbidity of the stroke survivors and on the quality of life of the stroke survivors and their carers. | A stratified randomised controlled trial          | 200 stroke patients and caregivers                     |
| 42 | Mudzi et al (2013)      | Gauteng      | Urban           | Community                | Dissertations                                   | to establish the extent of community participation and the barriers and facilitators to the participation for stroke patients after their discharge.         | longitudinal study                                | 200 patients with first-time ischaemic stroke          |
| 43 | Ntamo (2011)            | Eastern Cape | Urban           | Mthatha General Hospital | Dissertations                                   | To identify factors that influence poor attendance for outpatient physiotherapy by patients discharged from MGH with a stroke.                               | Mixed methods (Qualitative + Quantitative study)  | 85 stroke patients attending Physiotherapy at MGH      |
| 44 | Parekh and Rhoda (2013) | Western Cape | Urban           | Tertiary hospital        | Primary Literature (peer reviewed publications) | To determine functional outcomes and factors influencing functional outcomes of stroke patients admitted to a South African tertiary hospital                | Longitudinal Pre and Post test design             | 100 stroke patients                                    |
| 45 | Parekh                  | Western      | Urban           | Tertiary                 | Dissertations                                   | to identify factors influencing                                                                                                                              | A descriptive,                                    | 66 stroke patients                                     |

|    |                        |                                                 |              |                        |                                                 |                                                                                                                                                                                          |                                                       |                                                                                                                           |
|----|------------------------|-------------------------------------------------|--------------|------------------------|-------------------------------------------------|------------------------------------------------------------------------------------------------------------------------------------------------------------------------------------------|-------------------------------------------------------|---------------------------------------------------------------------------------------------------------------------------|
|    | (2011)                 | Cape                                            |              | hospital               |                                                 | functional outcome of stroke patients admitted to a South African tertiary hospital                                                                                                      | observational, longitudinal quantitative study design |                                                                                                                           |
| 46 | Posner (2015)          | Gauteng                                         | Urban        | Community              | Dissertations                                   | to explore the experiences and perceived needs of employed caregivers working for patients who have suffered from a stroke within home settings in South Africa.                         | Qualitative research design with Interviews + FGDs    | 15 employed caregivers working at the homes of stroke survivors FGDs with 10 participants 5 in each group                 |
| 47 | Ras (2009)             | Western Cape                                    | Urban        | NGO Run Hospital booth | Dissertations                                   | to assess the quality of the stroke rehabilitation services at Booth Memorial Hospital.                                                                                                  | Cross-sectional audit of records                      | NA                                                                                                                        |
| 48 | Rhoda (2009)           | Western Cape                                    | Peri - Urban | CHC                    | Primary Literature (peer reviewed publications) | to determine the structure and process of rehabilitation of stroke patients at Community Health Centres (CHCs) in the Western Cape                                                       | Quantitative cross-sectional survey                   | 100 first time stroke patients and 16 therapists                                                                          |
| 49 | Rhoda et al (2011)     | Western Cape                                    | Peri - Urban | CHC                    | Primary Literature (peer reviewed publications) | to determine the activity limitations of stroke patients receiving rehabilitation at out-patient Community health Centres (ChCs)                                                         | Longitudinal observational study                      | 100 patients with stroke                                                                                                  |
| 50 | Rhoda (2014)           | Western Cape                                    | Peri - Urban | CHC                    | Primary Literature (peer reviewed publications) | to determine the quality of life and factors influencing quality of life of community-dwelling stroke patients living in low-income, peri-urban areas in the Western Cape, South Africa. | Observational, longitudinal study                     | 100 first time stroke patients                                                                                            |
| 51 | Rhoda et al (2015)     | South Africa (Eastern Cape) Tanzania and Rwanda | Undefined    | Provincial hospital    | Primary Literature (peer reviewed publications) | the provision of inpatient rehabilitation and the post discharge challenges of stroke survivors in specific African countries.                                                           | Retrospective survey and interviews                   | 168 SA stroke patients 145 Tanzanian and 130 Rwandan stroke patients 9 SA patients, 10 TP and 10 RP for qualitative study |
| 52 | Rouillard et al (2012) | Western Cape                                    | Urban        | WCRC rehab centre      | Primary Literature (peer reviewed publications) | To determine activity limitations, participation restrictions, health-related quality of life and caregiver strain in community-dwelling                                                 | Longitudinal and descriptive study                    | 46 stroke patients 41 caregivers                                                                                          |



|    |                         |               |               |                 |                                                        |                                                                                                                                                                            |                                                      |                                  |
|----|-------------------------|---------------|---------------|-----------------|--------------------------------------------------------|----------------------------------------------------------------------------------------------------------------------------------------------------------------------------|------------------------------------------------------|----------------------------------|
|    |                         |               |               |                 |                                                        | stroke survivors discharged from an intensive inpatient rehabilitation programme at 6 months post stroke.                                                                  |                                                      |                                  |
| 53 | SA-CSRG 2019            | National      | NA            | NA              | Primary literature (Peer-reviewed, Clinical Guideline) | contextualised development of stroke rehabilitation guideline                                                                                                              | Guideline                                            | NA                               |
| 54 | Scheffler and Mash 2019 | Western Cape  | Rural         | Community       | Primary Literature (peer reviewed publications)        | To describe and analyze the outcomes of patients with stroke from a rural PHC setting in the Western Cape, South Africa.                                                   | Longitudinal survey                                  | 93 stroke patients               |
| 55 | Smith (2019)            | Western Cape  | Western Cape  | Urban and Rural | Community                                              | To explore the self-management strategies employed by stroke survivors in the Western Cape, South Africa                                                                   | Exploratory qualitative design (In-depth Interviews) | 14 stroke survivors              |
| 56 | Taylor & Ntusi (2019)   | South Africa  | South Africa  | Undefined       | Undefined                                              | To improve management of stroke in South Africa                                                                                                                            | Editorial (Review)                                   | NA                               |
| 57 | Thomas & Greenop (2008) | Gauteng       | Gauteng       | Urban           | Community                                              | To investigate into the complexities of caregiving, including both perceptions and experiences of the healthcare system.                                                   | Qualitative design (interviews)                      | 6 caregivers of stroke survivors |
| 58 | Viljoen (2014)          | Western Cape  | Western Cape  | Urban           | Groote Schuur Hospital                                 | To determine the cost of stroke care and to identify factors associated with increased expense, as well as to evaluate the quality of stroke care in general medical wards | Review of records                                    | 261 stroke patient (records)     |
| 59 | Wasserman et al 2009    | KwaZulu-Natal | KwaZulu-Natal | Rural           | Community                                              | To assess discharge planning of stroke patients and to evaluate integration and continuity of stroke care between hospital and community                                   | Quantitative design (Survey)                         | 30 stroke patients               |
