# Supplementary material for: Towards universal health coverage for people with stroke in South Africa: a scoping review
Source: PubMed Central journal article supplement (PMC8627414; doi:10.1136/bmjopen-2021-049988), 2021-11-24
Supplement: bmjopen-2021-049988supp004.pdf [file bmjopen-2021-049988supp004.pdf]

**Supplementary file S4:** Components assessed in included studies

| Author (year)                  | Governance /Regulation | Resources | Service Delivery | Context | Re-organisation of care | Community engagement |
|--------------------------------|------------------------|-----------|------------------|---------|-------------------------|----------------------|
| Arowoia (2014)                 |                        |           | X                | X       |                         |                      |
| Bham & Ross 2005               |                        |           | X                | X       |                         |                      |
| Biggs (2005)                   |                        | X         | X                | X       |                         | X                    |
| Biggs & Rhoda (2008)           |                        |           |                  | X       |                         |                      |
| Blackwell & Littlejohns (2010) |                        |           | X                |         |                         |                      |
| Botha (2008)                   |                        |           |                  |         | X                       | X                    |
| Bryer (2009)                   |                        | X         | X                |         |                         |                      |
| Bryer et al (2010)             | X                      |           |                  |         |                         |                      |
| Burton 2016                    |                        |           |                  |         | X                       | X                    |
| Cawood 2012                    |                        | X         | X                |         |                         | X                    |
| Cawood& Visagie (2015)         |                        |           | X                |         |                         | X                    |
| Cawood & Visagie (2016)        |                        |           | X                |         |                         | X                    |
| Cawood et al (2016)            |                        |           |                  |         |                         | x                    |
| Connor (2005)                  | X                      | X         |                  | X       |                         |                      |
| Cunningham (2012)              |                        | X         | X                | X       |                         | X                    |
| Cunningham & Rhoda (2014)      |                        |           |                  |         |                         | X                    |
| De la Cornillère (2007)        |                        |           | X                | X       |                         | X                    |
| De Villiers et al (2009)       |                        |           | X                |         |                         |                      |
| De Villiers (2011)             |                        | X         | X                |         |                         |                      |
| Elloker (2015)                 |                        |           |                  |         |                         | X                    |
| Faux (2006)                    |                        |           |                  |         | X                       |                      |
| Felemengas (2005)              |                        |           | X                | X       |                         | X                    |
| Groenewald & Rhoda (2017)      |                        |           | X                |         |                         |                      |
| Groenewald (2018)              |                        |           | X                |         | X                       |                      |
| Hassan et al (2011)            |                        |           |                  | X       |                         |                      |
| Hilton (2011)                  |                        |           | X                | X       |                         |                      |
| Hossain (2016)                 |                        |           | X                |         | X                       |                      |
| Joseph (2012)                  |                        |           | X                |         |                         | X                    |
| Kleineibst (2007)              |                        | X         | X                | X       |                         |                      |
| Kotsokoane et al (2018)        |                        |           | X                |         |                         | X                    |
| Kusambiza-Kiingi (2016)        |                        |           | X                | X       |                         |                      |
| Leichtfuss (2009)              |                        | X         | X                |         |                         | X                    |
| Mabunda (2015)                 |                        |           | X                |         |                         |                      |
| Makganye (2015)                |                        | X         | X                | X       |                         |                      |
| Maleka et al (2012)            |                        | X         |                  | X       |                         | X                    |
| Mamabolo et al (2008)          |                        |           |                  |         |                         | X                    |
| Mandizvidza (2017)             | X                      | X         | X                |         |                         |                      |
| Mashau et al (2016)            |                        |           | X                |         |                         |                      |
| Masuku et al (2018)            |                        |           | X                | X       |                         |                      |
| Matshikiza (2019)              |                        | X         | X                |         |                         |                      |
| Mudzi (2010)                   |                        |           | X                | X       |                         | X                    |
| Mudzi et al (2013)             |                        |           | X                | X       |                         |                      |

|                           |          |           |           |           |          |           |
|---------------------------|----------|-----------|-----------|-----------|----------|-----------|
| Ntamo (2011)              |          | X         | X         | X         |          | X         |
| Parekh and Rhoda (2013)   |          |           | X         |           |          |           |
| Parekh (2011)             |          |           | X         |           |          |           |
| Posner (2015)             |          |           | X         |           |          |           |
| Ras (2009)                |          | X         | X         |           |          |           |
| Rhoda (2009)              |          | X         | X         |           |          |           |
| Rhoda et al (2011)        |          |           | X         |           |          |           |
| Rhoda (2014)              |          |           | X         | X         |          |           |
| Rhoda et al (2015)        |          |           | X         | X         |          |           |
| Rouillard et al (2012)    |          |           | X         | X         |          |           |
| SA-CSR                    | X        |           |           |           |          |           |
| Scheffler and Mash (2019) |          |           | X         |           |          |           |
| Smith (2019)              |          |           | X         | X         |          |           |
| Taylor & Ntusi (2019)     |          |           | X         |           |          |           |
| Thomas & Greenop (2008)   |          |           | X         | X         |          |           |
| Viljoen (2016)            |          | X         | X         |           |          |           |
| Wasserman et al (2009)    |          |           | X         |           |          |           |
| <b>Total</b>              | <b>4</b> | <b>16</b> | <b>47</b> | <b>24</b> | <b>5</b> | <b>19</b> |

∪
